# Supplementary material for: The effect of acute moderate-intensity exercise on the serum and fecal metabolomes and the gut microbiota of cross-country endurance athletes
Source: Springer Nature journal article supplement (doi:10.1038/s41598-021-82947-1), 2021-02-11
Supplement: MOESM2 [file 41598_2021_82947_MOESM2_ESM.pdf]

# The effect of acute moderate-intensity exercise on the serum and fecal metabolomes and the gut microbiota of cross-country endurance athletes

Mariangela Tabone<sup>1†</sup>, Carlo Bressa<sup>1†</sup>, Jose Angel García-Merino<sup>1</sup>, Diego Moreno-Pérez<sup>2</sup>, Emeline Chu Van<sup>3</sup>, Florence A. Castelli<sup>3</sup> François Fenaille<sup>3\*</sup>, Mar Larrosa<sup>1\*</sup>

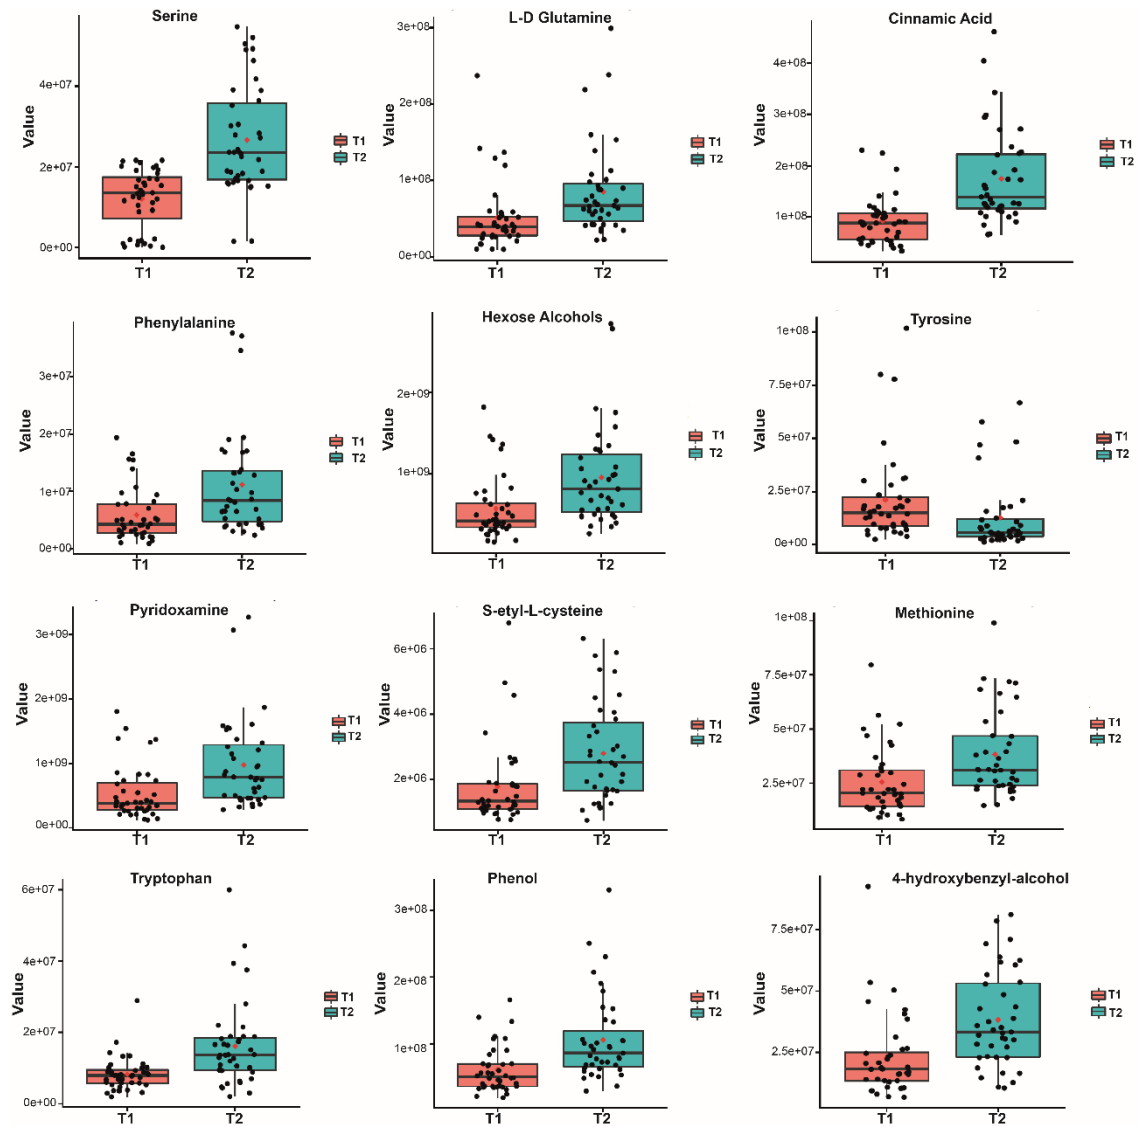

Figure S1: Fecal metabolites whose peak intensity is significantly different between T1 and T2 (p-adjusted < 0.05).

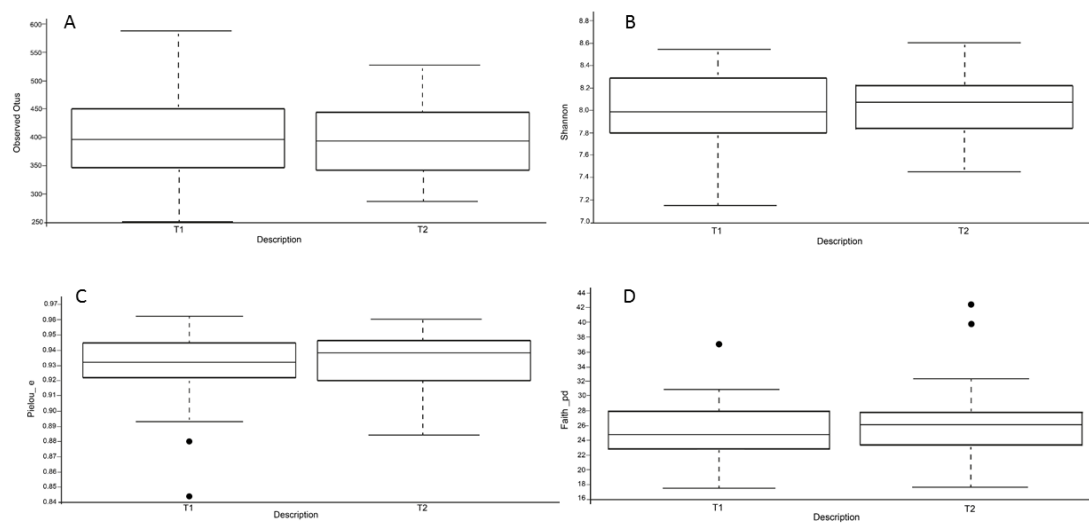

Figure S2: Box plots showing alpha diversity, A) Observed OTUs, B) Shannon Index, C) Pielou's evenness index and D) Faith's Phylogenetic Diversity index in T1 and T2.
