# Supplementary material for: The effect of acute moderate-intensity exercise on the serum and fecal metabolomes and the gut microbiota of cross-country endurance athletes
Source: Sci Rep. 2021 Feb 11;11:3558. doi: 10.1038/s41598-021-82947-1 (PMC7878499; doi:10.1038/s41598-021-82947-1)
Supplement: Supplementary file 1 — Supplementary Information 1. [file 41598_2021_82947_MOESM1_ESM.xlsx]

## Sheet: Hoja1
The effect of acute moderate-intensity exercise on the serum and fecal metabolomes and the gut microbiota of cross-country endurance athletes
Mariangela Tabone1†, Carlo Bressa1†, Jose Angel García-Merino1, Diego Moreno-Pérez2, Emeline Chu Van3, Florence A. Castelli3 François Fenaille3*, Mar Larrosa 1*

## Sheet: Table S1
Table S1. List of serum metabolites discriminating the athletes at T1 and T2
LC-MS conditions	Variable	Metabolite	p-value	p-value (BH adjusted)	T1/T2	RT (min)	m/z	Ion type	Internal reference number	Chemical class	Kegg Number	Identification status (a: m/z of reference, b, RT of reference, c: MS² of reference, d: interpretation of MS²)
C18(+)	M204T59_2	O-Acetyl-L-carnitin	1.19204e-17	0	0.44	0.978	204.123	[M+]	86	Lipids	C02571	a, b, c
C18(+)	M206T255	Xanthurenic acid	1.64694e-07	0	0.5	4.2435	206.045	[M+H]+	314	Amino Acids, Peptides, and Analogues	C02470	a, b, c
C18(+)	M285T92	Xanthosine	1.0502e-16	0	0.15	1.53333	285.083	[M+H]+	275	Nucleosides, Nucleotides, and Analogues	C01762	a, b, c
C18(+)	M347T476	21-Deoxycortisol / Corticosterone	8.2818e-10	0	0.24	7.93783	347.221	[M+H]+	206/338	Lipids	C05497/C02140	a, b, c
C18(+)	M190T275	Kynurenic acid	2.83211e-10	0	0.59	4.5795	190.05	[M+H]+	265	Amino Acids, Peptides, and Analogues	C01717	a, b, c
C18(+)	M245T66_2	beta-Pseudouridine	1.11722e-12	0	0.46	1.10267	245.077	[M+H]+	1138	Carbohydrates and Carbohydrate Conjugates	C02067	a, b, c
C18(+)	M208T349	N-Acetyl-L-phenylalanine	6.58407e-11	0	0.4	5.81867	208.097	[M+H]+	882	Amino Acids, Peptides, and Analogues	C03519	a, b, c
C18(+)	M218T83	Propionylcarnitine	2.93417e-12	0	0.47	1.38583	218.139	[M+]	1117	Lipids	C03017	a, b, c
C18(+)	M224T255	N-Acetyl-L-tyrosine	6.2561e-09	0	0.34	4.24267	224.092	[M+H]+	730	Amino Acids, Peptides, and Analogues	C01657	a, b
C18(+)	M298T96	2-O-Methylguanosine	6.78288e-12	0	0.64	1.60483	298.114	[M+H]+	1120	Nucleosides, Nucleotides, and Analogues	NA	a, b, c
HILIC(-)	M89T255_3	Lactic acid	6.69955e-14	0	0.86	4.252	89.0244	[M-H]-	243	Organic Acids and Derivatives	C00256	a, b, c
HILIC(-)	M103T235	(S)-3-Hydroxybutyric acid	2.38524e-06	0	1.05	3.9215	103.04	[M-H]-	356	Organic Acids and Derivatives	C03197	a, b, c
HILIC(-)	M115T536	Maleic acid/Fumaric acid	2.93417e-12	0	0.84	8.9265	115.004	[M-H]-	556/12	Lipids	C01384/C00122	a, b, c
HILIC(-)	M117T514	Succinic acid	7.48032e-14	0	0.95	8.561	117.019	[M-H]-	18	Organic Acids and Derivatives	C00042	a, b, c
HILIC(-)	M135T271	Hypoxanthine	4.53082e-13	0	0.84	4.5095	135.031	[M-H]-	986	Aromatic Heteropolycyclic Compounds	C00262	a, b, c
HILIC(-)	M173T592	Dehydroascorbic acid	1.59611e-13	0	0.91	9.87483	173.009	[M-H]-	262	Carbohydrates and Carbohydrate Conjugates	C00425	a, b, c
HILIC(-)	M175T511	Glucuronic acid gamma-lactone	4.52012e-10	0	0.87	8.50917	175.025	[M-H]-	760	Aliphatic Heteropolycyclic Compounds	C02670	a, b
HILIC(-)	M188T484	N-Acetyl-D/L-glutamic acid	8.81293e-09	0	0.81	8.07317	188.057	[M-H]-	898/576	Amino Acids, Peptides, and Analogues	C00624	a, b, c
HILIC(-)	M243T239	Uridine	4.83681e-08	0	0.99	3.97933	243.063	[M-H]-	998	Nucleosides, Nucleotides, and Analogues	C00299	a, b, c
HILIC(-)	M120T520	L-Cysteine	6.20037e-07	0	0.52	8.66167	120.013	[M-H]-	26	Amino Acids, Peptides, and Analogues	NA	a, b
HILIC(-)	M129T430	Citraconic acid	2.90398e-08	0	1.29	7.16033	129.02	[M-H]-	451	Lipids	C02226	a, b, c
HILIC(-)	M133T536_2	Malic acid	3.05225e-14	0	0.81	8.94017	133.014	[M-H]-	15	Organic Acids and Derivatives	C00711	a, b, c
HILIC(-)	M145T522	Ketoglutaric acid	8.31545e-10	0	0.71	8.70483	145.014	[M-H]-	422	Organic Acids and Derivatives	C00026	a, b, c
HILIC(-)	M151T397_2	Xanthine	2.24008e-08	0	0.91	6.62233	151.026	[M-H]-	123	Aromatic Heteropolycyclic Compounds	C00385	a, b, c
HILIC(-)	M161T460	3-Hydroxy-3-methylglutaric acid	1.39604e-11	0	1.02	7.66833	161.046	[M-H]-	676	Organic Acids and Derivatives	C03761	a, b, c
HILIC(-)	M174T499	N-Acetyl-L-aspartic acid	1.07982e-08	0	1.48	8.30917	174.041	[M-H]-	575	Amino Acids, Peptides, and Analogues	C01042	a, b, c
HILIC(-)	M181T213	Hydroxyphenyllactic acid	1.96748e-07	0	0.78	3.54817	181.051	[M-H]-	899	Aromatic Homomonocyclic Compounds	C03672	a, b, c
HILIC(-)	M218T204	Pantothenic acid	5.017e-13	0	0.82	3.40783	218.104	[M-H]-	58	Aliphatic Acyclic Compounds	C00864	a, b, c
HILIC(-)	M127T124	Dihydrothymine	1.19775e-06	0	0.96	2.07033	127.052	[M-H]-	1114	Aliphatic Heteromonocyclic Compounds	C00906	a, b, c
C18(+)	M188T47_2	N8-Acetylspermidine	7.71186e-10	0	0.67	0.776	188.176	[M+H]+	250	Organic Acids and Derivatives	C01029	a, b
HILIC(-)	M129T592	trans-Aconitic acid	3.13369e-15	0	0.97	9.87467	129.02	[(M-H)-CO2]-	305	Organic Acids and Derivatives	C02341	a, b, c
HILIC(-)	M190T135	N-Acetyl-L-methionine	1.64694e-07	0	1.01	2.24233	190.054	[M-H]-	904	Amino Acids, Peptides, and Analogues	C02712	a, b
C18	M247T365	N-acetyl-DL-tryptophan	1.27285e-10	0	0.3	6.08083	247.108	[M+H]+	1107	Amino Acids, Peptides, and Analogues	NA	a, b, c
C18(+)	M177T92	Serotonin	7.60386e-06	0.0001	0.66	1.53383	177.102	[M+H]+	622	Aromatic Heteropolycyclic Compounds	C00780	a, b, c
HILIC(-)	M131T549	Ornithine	6.56404e-06	0.0001	0.93	9.14617	131.083	[M-H]-	163	Amino Acids, Peptides, and Analogues	C00077	a, b, c
HILIC(-)	M191T592	Citric acid/Isocitric acid	9.68939e-06	0.0001	0.92	9.87433	191.02	[M-H]-	14/46	Organic Acids and Derivatives	C00158/C00311	a, b, c
HILIC(-)	M129T103_2	Methyl-oxovaleric	8.79766e-06	0.0001	0.85	1.7185	129.056	[M-H]-	888/1036/1143/947	Lipids	C00233/C03465	a, b
HILIC(-)	M131T458	Asparagine	1.01666e-05	0.0001	0.98	7.62717	131.047	[M-H]-	33	Amino Acids, Peptides, and Analogues	C00152	a, b, c
HILIC(-)	M131T119	2-hydroxycaproic acid	5.94701e-06	0.0001	0.92	1.97583	131.072	[M-H]-	194	Organic Acids and Derivatives	NA	a, b, c
HILIC(-)	M239T519	L-Cystine	5.38502e-06	0.0001	0.56	8.6465	239.017	[M-H]-	267	Amino Acids, Peptides, and Analogues	C00491	a, b, c
HILIC(-)	M155T312	Orotic acid	1.17343e-05	0.0001	0.89	5.20733	155.01	[M-H]-	227	Amino Acids, Peptides, and Analogues	C00295	a, b
C18(+)	M158T225	N-Tiglylglycine/3-Methylcrotonyl-glycine	2.58665e-05	0.0002	0.63	3.74967	158.081	[M+H]+	1136/1137	Amino Acids, Peptides, and Analogues	NA	a, b
C18(+)	M253T94	Alanyl-Tyrosine	3.54338e-05	0.0002	1.86	1.57183	253.118	[M+H]+	1037	Peptides	NA	a, b, c
HILIC(-)	M215T451	Hexose	6.52913e-05	0.0005	0.89	7.51633	215.033	[M+Cl]-	71/1180/97	Carbohydrates and Carbohydrate Conjugates	C00031/C02336	a, b
HILIC(-)	M88T483	Alanine	8.78413e-05	0.0006	0.88	8.05533	88.0406	[M-H]-	29	Amino Acids, Peptides, and Analogues	C00041	a, b
HILIC(-)	M181T346_2	Mannitol/Dulcitol	8.78413e-05	0.0006	0.93	5.77367	181.07	[M-H]-	978/1187	Lipids	C00392/C01697	a, b
HILIC(-)	M101T145	2-Oxobutyric acid	0.000108188	0.0007	0.8	2.4235	101.025	[M-H]-	1179	Organic Acids and Derivatives	C00109	a, b
HILIC(-)	M179T554	Myo-inositol	0.00013838	0.0008	0.88	9.22567	179.056	[M-H]-	76	Aliphatic Homomonocyclic Compounds	C00137	a, b, c
C18(+)	M184T87	4-Pyridoxic acid	0.000162677	0.0009	0.44	1.45217	184.06	[M+H]+	678	Aromatic Heteromonocyclic Compounds	C00847	a, b, c
HILIC(-)	M101T133	Isovaleric acid	0.000156256	0.0009	2.03	2.2125	101.061	[M-H]-	537	Lipids	C08262	a, b, c
HILIC(-)	M200T582	L-Cysteine S-sulfate	0.000156256	0.0009	0.96	9.70067	199.969	[M-H]-	717	Amino Acids, Peptides, and Analogues	C05824	a, b, c
C18(+)	M126T44	alpha-Methylhistamine	0.0001825	0.001	0.6	0.731	126.103	[M+H]+	1100	Aromatic Heteromonocyclic Compounds	C05127	a, b, c
C18(+)	M146T42	Spermidine	0.000232533	0.0013	1.39	0.693	146.165	[M+H]+	83	Aliphatic Acyclic Compounds	C00315	a, b, c
HILIC(-)	M163T101	Phenylpyruvic acid/Hydroxycinnamic acid	0.000232533	0.0013	0.73	1.68183	163.04	[M-H]-	1018/1019	Aromatic Homomonocyclic Compounds	C00166/C12621	a, b, c
HILIC(-)	M267T313	Inosine	0.000261407	0.0014	0.91	5.2195	267.074	[M-H]-	54	Nucleosides, Nucleotides, and Analogues	C00294	a, b, c
HILIC(-)	M118T426	Threonine	0.000383366	0.002	0.92	7.09783	118.051	[M-H]-	31	Amino Acids, Peptides, and Analogues	C00188	a, b, c
HILIC(-)	M149T461	Arabinose	0.000429109	0.0022	0.9	7.68883	149.046	[M-H]-	897	Carbohydrates and Carbohydrate Conjugates	C00259	a, b, c
C18(+)	M284T75	Guanosine	0.000523042	0.0026	0.2	1.2455	284.099	[M+H]+	5	Nucleosides, Nucleotides, and Analogues	C00387	a, b, c			a	Based on accurate mass
HILIC(-)	M200T93	Caprylolyglycine	0.000516667	0.0026	0.97	1.54367	200.129	[M-H]-	1199	Amino Acids, Peptides, and Analogues	NA	a, b, c			b	Based on retention time similarity with a standard
C18(+)	M283T107	2-O-Methylinosine	0.000826831	0.0039	0.82	1.7835	283.103	[M+H]+	1115	Nucleosides, Nucleotides, and Analogues	NA	a, b, c			b	Based on retention time similarity with a standard
HILIC(-)	M259T558	Hexose Phosphate	0.00102104	0.0049	2.07	9.2925	259.023	[M-H]-	281/477/1186/700/490/416	Carbohydrates and Carbohydrate Conjugates	C00103/C01094/C00446/C00085/C00275/C00636	C
HILIC(-)	M167T313	Vanillic acid/Isovanillic acid	0.0014887	0.0068	0.67	5.222	167.035	[M-H]-	236/1098	Aromatic Homomonocyclic Compounds	C06672	a, b, c
HILIC(-)	M213T83	Tridecanoic acid	0.00170224	0.0077	1.04	1.38017	213.186	[M-H]-	641	Lipids	C17076	a, b, c
HILIC(-)	M145T575_1	Lysine	0.00244055	0.0106	0.93	9.57883	145.098	[M-H]-	23	Amino Acids, Peptides, and Analogues	C00047	a, b, c
HILIC(-)	M147T514	Hydroxyglutaric acid	0.00277386	0.0118	0.96	8.56017	147.03	[M-H]-	803	Organic Acids and Derivatives	C01087	a, b, c
HILIC(-)	M128T347	Pipecolinic acid	0.00295546	0.0125	1.02	5.7765	128.072	[M-H]-	272	Amino Acids, Peptides, and Analogues	C00408	a, b
C18(+)	M189T56	N6-Acetyl-L-lysine	0.00324799	0.0127	0.84	0.935	189.123	[M+H]+	728	Amino Acids, Peptides, and Analogues	C02727	a, b, c			c	Based on MS² spectrum similarity with a standard
HILIC(-)	M129T490	Glutaconic acid	0.00305022	0.0129	1.17	8.168	129.02	[M-H]-	516	Lipids	C02214	a, b, c
HILIC(-)	M104T467	Serine	0.00324799	0.0136	0.97	7.78933	104.035	[M-H]-	37	Amino Acids, Peptides, and Analogues	C00065	a, b, c
HILIC(-)	M174T521	Guanidinosuccinic acid	0.00415965	0.017	0.77	8.68117	174.052	[M-H]-	282	Amino Acids, Peptides, and Analogues	C03139	a, b, c
HILIC(-)	M185T429	Arabinose/Xylulose	0.00442076	0.0179	0.94	7.14283	185.022	[M+Cl]-	325/897/656	Carbohydrates and Carbohydrate Conjugates		a, b
HILIC(-)	M116T320_1	Valine/Betaine	0.00442076	0.0179	0.92	5.33	116.072	[M-H]-	30/439	Amino Acids, Peptides, and Analogues	C00183/C00719	a, b, c
HILIC(-)	M154T433	Histidine	0.00455674	0.0184	0.79	7.2185	154.062	[M-H]-	22	Amino Acids, Peptides, and Analogues	C00135	a, b, c
C18(+)	M221T90	5-hydroxytryptophan	0.00561809	0.0195	0.83	1.49717	221.093	[M+H]+	191	Amino Acids, Peptides, and Analogues	NA	a, b, c
HILIC(-)	M227T81	Myristic acid	0.00545409	0.0214	1.26	1.35717	227.202	[M-H]-	725	Lipids	C06424	a, b
C18(+)	M192T279	5-Hydroxyindoleacetic acid	0.0068945	0.0228	0.83	4.65483	192.065	[M+H]+	239	Aromatic Heteropolycyclic Compounds	C05635	a, b, c
HILIC(-)	M128T291_2	Pyroglutamic acid	0.00709645	0.0265	0.87	4.846	128.035	[M-H]-	950	Aliphatic Heteromonocyclic Compounds	C01879/C02237	a, b, c
HILIC(-)	M155T395	Imidazolelactic acid	0.00866312	0.0312	0.97	6.5795	155.046	[M-H]-	283	Aromatic Heteromonocyclic Compounds	C05132	a, b, c
HILIC(-)	M281T79_2	Elaidic acid	0.00942318	0.0335	1.41	1.317	281.249	[M-H]-	498	Lipids	C00712	a, b
HILIC(-)	M145T455_2	Glutamine	0.0102414	0.036	0.95	7.5805	145.062	[M-H]-	24	Amino Acids, Peptides, and Analogues	C00064/C00819	a, b, c
C18(+)	M113T66	Uracil	7.51109e-13	0	0.46	1.10317	113.034	[M+H]+	170	Aromatic Heteromonocyclic Compounds	C00106	a, b, c
C18(+)	M169T61_3	Uric acid	6.55564e-07	0	0.79	1.01033	169.035	[M+H]+	274	Aromatic Heteropolycyclic Compounds	C00366	a, b, c
C18(+)	M206T363	Indolelactic acid	7.48645e-08	0	0.71	6.04867	206.081	[M+H]+	221	Aromatic Heteropolycyclic Compounds	C02043	a, b, c
C18(+)	M114T51	Creatinine	1.48634e-05	0.0001	0.83	0.844167	114.066	[M+H]+	997	Aliphatic Heteromonocyclic Compounds	C00791	a, b, c
C18(+)	M205T235_3	Tryptophan	0.00469644	0.017	1.14	3.91733	205.097	[M+H]+	289	Amino Acids, Peptides, and Analogues	C00806	a, b, c

## Sheet: Table S2
Table S2. List of fecal metabolites discriminating the athletes at T1 and T2
LC-MS conditions	Variable	Metabolite	p-value	p-value (BH adjusted)	T1/T2	RT (min)	m/z	Ion type	Internal reference number	Chemical class	Kegg Number	Identification status (a: m/z of reference, b, RT of reference, c: MS² of reference, d: interpretation of MS²)
HILIC(-)	M145T436	L/D-Glutamine	2.63066e-08	0.0001	0.53	7.26667	145.062	[M-H]-	24/247	Amino Acids, Peptides, and Analogues	C00064/C00819	a, b, c
C18(+)	M205T244	Tryptophan	2.36059e-05	0.0212	0.58	4.07467	205.097	[M+H]+	289	Amino Acids, Peptides, and Analogues	C00806	a, b, c
HILIC(-)	M104T447	Serine	3.14947e-05	0.0212	0.6	7.45083	104.035	[M-H]-	37	Amino Acids, Peptides, and Analogues	C00065	a, b, c
HILIC(-)	M164T174	Phenylalanine	3.9891e-05	0.0218	0.55	2.90117	164.072	[M-H]-	27	Amino Acids, Peptides, and Analogues	C00079	a, b, c
C18(+)	M150T59_1	Methionine	6.93422e-05	0.0132	0.55	0.9895	150.058	[M+H]+	28	Amino Acids, Peptides, and Analogues	C00073	a, b, c
HILIC(-)	M181T326	Hexose alcohols	8.3009e-05	0.0224	0.57	5.43617	181.071	[M-H]-	978/…	Carbohydrates and Carbohydrate Conjugates	C00031	a, b, c
HILIC(-)	M180T326_2	Tyrosine	8.6798e-05	0.0224	0.6	5.438	180.067	[M-H]-	36	Amino Acids, Peptides, and Analogues	C00082	a, b, c
C18(+)	M133T59	S-ethyl-L-cysteine	8.6798e-05	0.0143	0.57	0.989833	133.032	[M+H-NH3]+	1095	Amino Acids, Peptides, and Analogues	NA	a, b
C18(+)	M95T112	Phenol	9.07477e-05	0.0145	0.63	1.86833	95.0488	[M+H]+	79	Aromatic Homomonocyclic Compounds	C00146	a, b, c
C18(+)	M107T151	4-Hydroxybenzyl-alcohol	0.000189471	0.0234	0.64	2.52267	107.049	[M+H-H2O]+	984	Aromatic Homomonocyclic Compounds	C17467	a, b
HILIC(-)	M167T124	Pyridoxamine	0.000253765	0.0426	1.66	2.06583	167.082	[M-H]-	256	Aromatic Heteromonocyclic Compounds	C00534	a, b
HILIC(-)	M147T174	Cinnamic acid	0.000264446	0.0433	0.53	2.90783	147.045	[M-H]-	43	Aromatic Homomonocyclic Compounds	C00423	a, b
HILIC(-)	M150T322	Guanine	0.00046481	0.0612	0.59	5.36733	150.042	[M-H]-	1102	Aromatic Heteropolycyclic Compounds	C00242	a, b, c
HILIC(-)	M118T404	Threonine	0.000634627	0.0735	0.58	6.7285	118.051	[M-H]-	31	Amino Acids, Peptides, and Analogues	C00188	a, b, c
C18(+)	M215T89	Val-Pro	0.000685175	0.0513	0.64	1.48733	215.139	[M+H]+	949	Peptides	NA	a, b, c
C18(+)	M132T74_3	Leucine/Isoleucine	0.000767952	0.0528	0.63	1.23667	132.102	[M+H]+	34/25	Amino Acids, Peptides, and Analogues	C00123/ C00407	a, b, c
HILIC(-)	M227T98	Leu-Pro	0.00103548	0.098	0.64	1.6275	227.14	[M-H]-	1061	Peptides	NA	a, b, c
HILIC(-)	M154T410	Histidine	0.00190631	0.1367	0.65	6.83483	154.062	[M-H]-	22	Amino Acids, Peptides, and Analogues	C00135	a, b, c
HILIC(-)	M129T97	4-Methyl-2-oxovaleric acid/3-Methyl-2-oxovaleric acid	0.00234589	0.1493	0.66	1.61483	129.056	[M-H]-	888/1036	Lipids	C03465	a, b
C18(+)	M187T58_1	L-Alanyl-L-proline	0.00297318	0.1162	0.74	0.971667	187.108	[M+H]+	946	Aromatic Heteromonocyclic Compounds	C00106	a, b, c
HILIC(-)	M266T266	Adenosine	0.00307419	0.1626	0.47	4.43083	266.089	[M-H]-	6	Nucleosides, Nucleotides, and Analogues	C00212	a, b, c
C18(+)	M173T51	Gly-Pro	0.00328551	0.1231	0.73	0.850667	173.092	[M+H]+	1109	Amino Acids, Peptides, and Analogues	NA	a, b, c
C18(+)	M137T54	Methylnicotinamide	0.00374779	0.1353	0.75	0.903667	137.072	[M+H]+	1103/1144/1021	Aromatic Heteromonocyclic Compounds	C7H8N2O	a, b
HILIC(-)	M174T467_1	L-Citrulline	0.00440728	0.1828	0.72	7.77867	174.088	[M-H]-	91	Amino Acids, Peptides, and Analogues	C00327	a, b, c
HILIC(-)	M131T467_4	Ornithine	0.00485112	0.1928	0.72	7.77767	131.083	[M-H]-	163	Amino Acids, Peptides, and Analogues	C00077	a, b
HILIC(-)	M125T136	Thymine	0.00568014	0.2097	0.47	2.26717	125.036	[M-H]-	1059	Aromatic Heteromonocyclic Compounds	C00178	a, b
HILIC(-)	M85T167	2,3-Butanedione	0.00604561	0.216	1.21	2.783	85.0295	[M-H]-	368	Aliphatic Acyclic Compounds	C00741	a, b, c
C18(+)	M244T49	Cytidine	0.00623608	0.1892	0.63	0.821	244.093	[M+H]+	10	Nucleosides, Nucleotides, and Analogues	C00475	a, b, c
HILIC(-)	M145T564	Lysine	0.00772542	0.2483	0.63	9.3935	145.098	[M-H]-	23	Amino Acids, Peptides, and Analogues	C16741	a, b, c
C18(+)	M253T75	Deoxyinosine	0.0107048	0.2528	0.49	1.24267	253.093	[M+H]+	146	Nucleosides, Nucleotides, and Analogues	C05512	a, b
HILIC(-)	M129T478	Citraconic acid	0.0127221	0.3177	1.28	7.96717	129.02	[M-H]-	451	Lipids	C02226	a, b, c
HILIC(-)	M115T176	2-Oxovaleric acid	0.0130888	0.3233	1.4	2.93117	115.04	[M-H]-	755	Organic Acids and Derivatives	C06255	a, b, c
HILIC(-)	M241T131_1	Thymidine	0.014245	0.3346	0.55	2.18417	241.083	[M-H]-	9	Nucleosides, Nucleotides, and Analogues	C00214	a, b
HILIC(-)	M114T362	Proline	0.01637	0.3629	0.71	6.035	114.056	[M-H]-	21	Amino Acids, Peptides, and Analogues	C00148	a, b, c
HILIC(-)	M226T224	Deoxycytidine	0.0214569	0.4142	0.55	3.74	226.083	[M-H]-	145	Nucleosides, Nucleotides, and Analogues	C00881	a, b, c
C18(+)	M175T49_2	N-Acetyl-ornithine	0.0244746	0.3793	0.79	0.8115	175.108	[M+H]+	337	Amino Acids, Peptides, and Analogues	C00437	a, b, c
HILIC(-)	M163T97	Hydroxycinnamic acid	0.0285688	0.4581	0.69	1.61833	163.04	[M-H]-	207	Aromatic Homomonocyclic Compounds	C01772	a, b, c
HILIC(-)	M215T549	Hexose	0.0285688	0.4581	1.27	9.15117	215.031	[M+Cl]-		Carbohydrates and Carbohydrate Conjugates	NA	a, b
HILIC(-)	M137T102	Salicylic acid	0.0293049	0.4611	1.83	1.692	137.025	[M-H]-	167	Aromatic Homomonocyclic Compounds	C00805	a, b, c
HILIC(-)	M149T408	Pentose	0.0340684	0.4808	1.15	6.80767	149.046	[M-H]-		Carbohydrates and Carbohydrate Conjugates	NA	a, b, c
HILIC(-)	M227T160	Deoxyuridine	0.0340684	0.4808	0.63	2.66333	227.067	[M-H]-	148/895	Nucleosides, Nucleotides, and Analogues	C00526	a, b, c
HILIC(-)	M110T300	Cytosine	0.0358649	0.4947	0.6	5.00283	110.037	[M-H]-	142	Aromatic Heteromonocyclic Compounds	C00380	a, b, c
HILIC(-)	M141T504	cis,cis-Muconic acid	0.0385228	0.5035	1.44	8.39167	141.019	[M-H]-	447	Lipids	C02480	a, b
HILIC(-)	M200T565	L-Cysteine S-sulfate	0.0404367	0.5097	0.72	9.4215	199.969	[M-H]-	717	Amino Acids, Peptides, and Analogues	C05824	a, b, c
HILIC(-)	M171T85	Capric acid	0.0424296	0.5201	0.63	1.40867	171.139	[M-H]-	45	Lipids	C01571	a, b, c
C18(+)	M113T60	Uracil	0.0434564	0.4764	0.74	0.997667	113.035	[M+H]+	170	Aromatic Heteromonocyclic Compounds	C00106	a, b, c
C18(+)	M252T65	Deoxyadenosine	0.046662	0.4883	0.83	1.07983	252.109	[M+H]+	143	Nucleosides, Nucleotides, and Analogues	C00559	a, b, c
C18(+)	M196T61_2	4-Carboxyphenylglycine	0.0477733	0.4906	1.4	1.01433	196.06	[M+H]+	1130	Amino Acids, Peptides, and Analogues	NA	a, b
C18(+)	M199T527	12-Hydroxydodecanoic-acid	0.0477733	0.4906	1	8.77717	199.169	[M+H-H2O]+	135	Lipids	C08317	a, b
C18(+)	M260T356	Hexanoylcarnitine	0.0477733	0.4906	1.05	5.93183	260.186	[M+H]+	1038	Organic Compounds	NA	a, b
											a	Based on accurate mass
											b	Based on retention time similarity with a standard
											c	Based on MS² spectrum similarity with a standard

## Sheet: Table S3
Table S3. Results from the pathway analysis of annotated serum metabolites discriminating T1 vs T2 (top-3 pathways)
Pathways Affected	Total no. of Compounds	Hits	p-value	FDR	Impact
Alanine, aspartate and glutamate metabolism	28	8	2.4e-05	0.0018747	0.25
Aminoacyl-tRNA biosynthesis	48	10	4.4637e-05	0.0018747	0.17
Arginine biosynthesis	14	5	0.00029024	0.006095	0.06
The Total is the number of compounds in the pathway
The Hits is the matched number fromthe user uploaded data
The raw p-value is the original p-value calculated from the enrichment analysis
The FDR is the p-value adjusted using False Discovery Rate
The Impact is the pathway impact value calculated from the pathway topology analysis

## Sheet: Table S4
Table S4. Results from the pathway analysis of annotated fecal metabolites discriminating T1 vs T2 (top-3 pathways)
Pathways Affected	Total	Hits	p-value	FDR	Impact
Aminoacyl-tRNA biosynthesis	48	5	5.18e-06	0.000435	0.17
Phenylalanine, tyrosine and tryptophan biosynthesis	4	2	0.000223	0.00938	1
Phenylalanine metabolism	10	2	0.00164	0.0459	0.36
The Total is the number of compounds in the pathway
The Hits is the matched number fromthe user uploaded data
The raw p-value is the original p-value calculated from the enrichment analysis
The FDR is the p-value adjusted using False Discovery Rate
The Impact is the pathway impact value calculated from the pathway topology analysis
